# Supplementary material
Source: PubMed Central journal article supplement (PMC7202572)
Supplement: NIHMS1010061-supplement-Supplementary.pdf [file NIHMS1010061-supplement-Supplementary.pdf]

Supplementary Material for ”*A Nonlinear Support  
Vector Machine based Feature Selection Approach for  
Fault Detection and Diagnosis: Application to the  
Tennessee Eastman Process*”

Melis Onel<sup>1,2</sup>, Chris A. Kieslich<sup>1,2,3</sup>, Efstratios N. Pistikopoulos<sup>1,2,\*</sup>

1. Artie McFerrin Department of Chemical Engineering,  
Texas A&M University, College Station, TX 77843, USA

2. Texas A&M Energy Institute,  
Texas A&M University, College Station, TX 77843, USA

3. Coulter Department of Biomedical Engineering,  
Georgia Institute of Technology, Atlanta, GA

\* *To whom correspondence should be addressed.* Email: stratos@tamu.edu

# 1 Tennessee Eastman Process Reactions & Process Variables

The reactions occurring in the reactor are as follows:

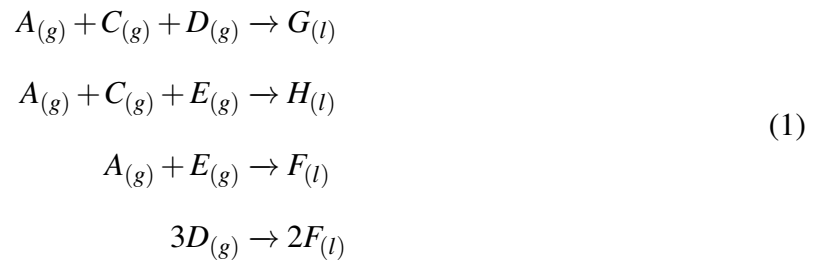

The process contains 11 manipulated (Table S2) and 41 measured (Table S1) variables.

Table S1: Measured variables in the Tennessee Eastman process.

| Variable No | Description                                | Measurement Type |
|-------------|--------------------------------------------|------------------|
| 1           | Feed A (Stream 1)                          | Process          |
| 2           | Feed D (Stream 2)                          | Process          |
| 3           | Feed E (Stream 3)                          | Process          |
| 4           | Total Feed (Stream 4)                      | Process          |
| 5           | Recycle Flow (Stream 8)                    | Process          |
| 6           | Reactor Feed Rate (Stream 6)               | Process          |
| 7           | Reactor Pressure                           | Process          |
| 8           | Reactor Level                              | Process          |
| 9           | Reactor Temperature                        | Process          |
| 10          | Purge Rate (Stream 9)                      | Process          |
| 11          | Product Separator Temperature              | Process          |
| 12          | Product Separator Level                    | Process          |
| 13          | Product Separator Pressure                 | Process          |
| 14          | Product Separator Underflow                | Process          |
| 15          | Stripper Level                             | Process          |
| 16          | Stripper Pressure                          | Process          |
| 17          | Stripper Underflow (Stream 11)             | Process          |
| 18          | Stripper Temperature                       | Process          |
| 19          | Stripper Steam Flow                        | Process          |
| 20          | Compressor Work                            | Process          |
| 21          | Reactor Cooling Water Outlet Temperature   | Process          |
| 22          | Separator Cooling Water Outlet Temperature | Process          |
| 23          | Component A (Stream 6)                     | Composition      |
| 24          | Component B (Stream 6)                     | Composition      |
| 25          | Component C (Stream 6)                     | Composition      |
| 26          | Component D (Stream 6)                     | Composition      |
| 27          | Component E (Stream 6)                     | Composition      |
| 28          | Component F (Stream 6)                     | Composition      |
| 29          | Component A (Stream 9)                     | Composition      |
| 30          | Component B (Stream 9)                     | Composition      |
| 31          | Component C (Stream 9)                     | Composition      |
| 32          | Component D (Stream 9)                     | Composition      |
| 33          | Component E (Stream 9)                     | Composition      |
| 34          | Component F (Stream 9)                     | Composition      |
| 35          | Component G (Stream 9)                     | Composition      |
| 36          | Component H (Stream 9)                     | Composition      |
| 37          | Component D (Stream 11)                    | Composition      |
| 38          | Component E (Stream 11)                    | Composition      |
| 39          | Component F (Stream 11)                    | Composition      |
| 40          | Component G (Stream 11)                    | Composition      |
| 41          | Component H (Stream 11)                    | Composition      |

Table S2: Manipulated variables in the Tennessee Eastman process.

| Variable No | Description                           |
|-------------|---------------------------------------|
| 42          | D Feed Flow (Stream 2)                |
| 43          | E Feed Flow (Stream 3)                |
| 44          | A Feed Flow (Stream 1)                |
| 45          | Total Feed Flow (Stream 4)            |
| 46          | Compressor Recycle Valve              |
| 47          | Purge Valve (Stream 9)                |
| 48          | Separator Pot Liquid Flow (Stream 10) |
| 49          | Stripper Liquid Product Flow          |
| 50          | Stripper Steam Valve                  |
| 51          | Reactor Cooling Water Flow            |
| 52          | Condenser Cooling Water Flow          |

## 2 Performance Metric Terminology & Formulations

In this study, the model performances are assessed with 5 metrics: (i) area under the curve (AUC), (ii) fault detection rate, or recall, (iii) accuracy, (iv) false alarm rate, and (v) false negative rate. These metrics are derivations achieved from the confusion (a.k.a error) matrix, which is a two-dimensional contingency table used to evaluate performance of a classifier model in statistics and machine learning. Below, we provide terminology and formulation of the 5 metrics adopted in this study.

Confusion matrix is a two-dimensional matrix containing the number of correct and false classification of instances for a binary classification problem. The elements of the matrix are True Positives (TP), False Positives (FP), True Negatives (TN), and False Negatives (FN). In this study, these numbers indicate:

*True Positives (TP)*: Predicting faulty operation as faulty.

*True Negatives (TN)*: Predicting fault-free (normal) operation as normal.

*False Positives (FP)*: Predicting normal operation as faulty.

*False Negatives (FN)*: Predicting faulty operation as normal.

Accordingly,

*Positive (P)*:  $TP+FN$

*Negative (N): TN+FP*

Accuracy is the percentage of correctly classified instances among all instances, which is calculated as follows:

$$Accuracy = \frac{TP + TN}{P + N}.$$

Accuracy is the most effective metric in the cases where class distribution is somewhat balanced.

Recall (also referred as detection rate) is a measure of completeness.

$$Recall = \frac{TP}{TP + FN}.$$

In this work, misclassification of the instances are assessed via false alarm rate (FAR) and false negative rate (FNR):

$$FAR = \frac{FP}{FP + TN}.$$

$$FNR = \frac{FN}{FN + TP}.$$

In the case of imbalanced data sets, collective evaluation of two metrics, namely recall and specificity, gains importance where

$$Specificity = \frac{TN}{TN + FP}.$$

Receiver Operating Characteristics (ROC) curve is the plot illustrating the classifier performance based on recall and specificity at varying classification thresholds. Particularly, the curve demonstrates true positive rate (recall) versus false positive rate ( $1-Specificity$ ) for all possible classification thresholds and area under this curve (a.k.a Area Under the Curve (AUC)) is a single metric derived from this advanced performance assessment.

### 3 C-SVM Model Parameters

Table S3: C-SVM hyperparameters for the models reported in Table 2.

| <b>Fault</b> | <b>Optimal Feature Subset Size</b> | $\hat{C}$ | $\hat{\gamma}$ |
|--------------|------------------------------------|-----------|----------------|
| 1            | 2                                  | 6         | 0              |
| 2            | 5                                  | 2         | -4             |
| 3            | 13                                 | 0         | 3              |
| 4            | 1                                  | -8        | -1             |
| 5            | 4                                  | 10        | -6             |
| 6            | 2                                  | -9        | 0              |
| 7            | 3                                  | -8        | 0              |
| 8            | 7                                  | 3         | 4              |
| 9            | 17                                 | 2         | 2              |
| 10           | 14                                 | 6         | 4              |
| 11           | 29                                 | 5         | 3              |
| 12           | 9                                  | 10        | 7              |
| 13           | 7                                  | 10        | 3              |
| 14           | 3                                  | -8        | 3              |
| 15           | 27                                 | 1         | 2              |
| 16           | 5                                  | 4         | 2              |
| 17           | 32                                 | 10        | -5             |
| 18           | 34                                 | 10        | -4             |
| 19           | 2                                  | 9         | 10             |
| 20           | 14                                 | 8         | 3              |
| 21           | 1                                  | 0         | 9              |

Table S4: C-SVM hyperparameters for the models reported in Table 3.

| <b>Fault</b> | <b>Optimal Feature Subset Size</b> | $\hat{C}$ | $\hat{\gamma}$ |
|--------------|------------------------------------|-----------|----------------|
| 8            | 4                                  | 5         | 4              |
| 17           | 27                                 | 10        | -5             |

Table S5: C-SVM hyperparameters for the models reported in Table 4.

| <b>Fault</b> | <b>Optimal Feature Subset Size</b> | $\hat{C}$ | $\hat{\gamma}$ |
|--------------|------------------------------------|-----------|----------------|
| 1            | 18                                 | 3         | 0              |
| 2            | 10                                 | 9         | -3             |
| 3            | 10                                 | 9         | 7              |
| 4            | 1                                  | -8        | 1              |
| 5            | 14                                 | 0         | -1             |
| 6            | 2                                  | -10       | 0              |
| 7            | 4                                  | -1        | 5              |
| 8            | 12                                 | 4         | 1              |
| 9            | 2                                  | 1         | 4              |
| 10           | 15                                 | 10        | -2             |
| 11           | 2                                  | 9         | -2             |
| 12           | 5                                  | 4         | 4              |
| 13           | 8                                  | 5         | 1              |
| 14           | 2                                  | -5        | 8              |
| 15           | 16                                 | 0         | 5              |
| 16           | 2                                  | 2         | 3              |
| 17           | 28                                 | 10        | -5             |
| 18           | 5                                  | 9         | 0              |
| 19           | 10                                 | 10        | -3             |
| 20           | 14                                 | 10        | -3             |

Table S6: C-SVM hyperparameters for the models reported in Table 5.

| <b>Fault</b> | <b>Optimal Feature Subset Size</b> | $\hat{C}$ | $\hat{\gamma}$ |
|--------------|------------------------------------|-----------|----------------|
| 5            | 3                                  | 9         | -7             |
| 18           | 2                                  | 9         | 1              |
| 19           | 3                                  | 10        | -2             |
| 20           | 13                                 | 10        | -3             |

## 4 Diagnosis of All Faults

Table S7: Diagnosis from the Table 2 end-models developed with *Chiang et. al* dataset. Faults 3, 9, and 15 are excluded due to poor model performance.

| <b>Fault</b> | <b>Optimal Feature Subset Size</b> | <b>Selected Process Variables</b>                                                                                              |
|--------------|------------------------------------|--------------------------------------------------------------------------------------------------------------------------------|
| 1            | 2                                  | 16, 44                                                                                                                         |
| 2            | 5                                  | 7, 16, 10, 47, 13                                                                                                              |
| 3            | 13                                 | 24, 28, 29, 26, 33, 31, 50, 25, 30, 27, 35, 18, 1                                                                              |
| 4            | 1                                  | 51                                                                                                                             |
| 5            | 4                                  | 4, 11, 52, 17                                                                                                                  |
| 6            | 2                                  | 44, 1                                                                                                                          |
| 7            | 3                                  | 45, 7, 13                                                                                                                      |
| 8            | 7                                  | 39, 44, 16, 20, 7, 23, 46                                                                                                      |
| 9            | 17                                 | 39, 41, 38, 40, 37, 50, 18, 19, 7, 13, 16, 20, 31, 33, 29, 35, 28                                                              |
| 10           | 14                                 | 41, 39, 38, 37, 40, 50, 19, 18, 20, 7, 13, 16, 31, 29                                                                          |
| 11           | 29                                 | 24, 29, 26, 30, 31, 32, 35, 50, 25, 33, 34, 23, 27, 18, 7, 16, 20, 38, 10, 19, 13, 37, 39, 44, 1, 41, 51, 47, 9                |
| 12           | 9                                  | 7, 16, 50, 18, 13, 19, 20, 38, 33                                                                                              |
| 13           | 7                                  | 39, 40, 18, 7, 38, 23, 3                                                                                                       |
| 14           | 3                                  | 9, 51, 21                                                                                                                      |
| 15           | 27                                 | 39, 41, 37, 40, 38, 50, 18, 19, 20, 7, 13, 16, 1, 44, 25, 31, 23, 33, 29, 36, 35, 34, 24, 30, 27, 47, 10                       |
| 16           | 5                                  | 50, 19, 18, 20, 13                                                                                                             |
| 17           | 32                                 | 38, 39, 40, 41, 21, 37, 19, 20, 33, 27, 34, 30, 1, 11, 25, 28, 24, 23, 35, 36, 26, 10, 3, 2, 22, 14, 48, 47, 32, 42, 8, 49     |
| 18           | 34                                 | 39, 40, 37, 41, 14, 49, 17, 48, 5, 52, 15, 12, 3, 9, 2, 32, 10, 26, 28, 24, 6, 11, 36, 20, 50, 22, 44, 13, 34, 1, 7, 8, 25, 18 |
| 19           | 2                                  | 32, 31                                                                                                                         |
| 20           | 14                                 | 41, 39, 40, 37, 50, 18, 46, 13, 19, 7, 16, 11, 33, 27                                                                          |
| 21           | 1                                  | 45                                                                                                                             |



Table S8: Diagnosis from the Table 4 end-models developed with *Rieth et. al* dataset. Faults 3, 9, and 15 are excluded due to poor model performance.

| <b>Fault</b> | <b>Optimal Feature Subset Size</b> | <b>Selected Process Variables</b>                                                                             |
|--------------|------------------------------------|---------------------------------------------------------------------------------------------------------------|
| 1            | 18                                 | 44, 16, 41, 4, 1, 11, 18, 21, 22, 20, 7, 51, 46, 38, 33, 13, 23, 24                                           |
| 2            | 10                                 | 38, 41, 10, 25, 16, 21, 7, 20, 47, 30                                                                         |
| 3            | 10                                 | 47, 51, 38, 16, 50, 18, 19, 21, 20, 13                                                                        |
| 4            | 1                                  | 51                                                                                                            |
| 5            | 14                                 | 52, 11, 17, 4, 18, 19, 46, 50, 20, 16, 44, 38, 29, 22                                                         |
| 6            | 2                                  | 44, 1                                                                                                         |
| 7            | 4                                  | 19, 18, 50, 45                                                                                                |
| 8            | 12                                 | 39, 41, 37, 16, 20, 44, 7, 46, 1, 27, 29, 40                                                                  |
| 9            | 2                                  | 51, 13                                                                                                        |
| 10           | 15                                 | 41, 38, 39, 37, 18, 19, 40, 25, 31, 29, 26, 23, 1, 50, 16                                                     |
| 11           | 2                                  | 9, 51                                                                                                         |
| 12           | 5                                  | 16, 38, 35, 25, 11                                                                                            |
| 13           | 8                                  | 41, 39, 7, 37, 40, 16, 32, 21                                                                                 |
| 14           | 2                                  | 51, 9                                                                                                         |
| 15           | 16                                 | 22, 7, 13, 18, 50, 19, 11, 16, 38, 35, 20, 9, 21, 46, 4, 29                                                   |
| 16           | 2                                  | 19, 50                                                                                                        |
| 17           | 28                                 | 35, 24, 38, 28, 18, 20, 19, 21, 46, 26, 36, 42, 37, 25, 29, 30, 39, 41, 40, 44, 32, 34, 22, 8, 10, 27, 31, 23 |
| 18           | 5                                  | 22, 8, 20, 11, 31                                                                                             |
| 19           | 10                                 | 13, 16, 46, 50, 19, 5, 7, 20, 38, 6                                                                           |
| 20           | 14                                 | 38, 39, 41, 16, 52, 17, 18, 30, 35, 29, 40, 13, 7, 47                                                         |
